## Correction: Insulin-like growth factor-independent insulin-like growth factor binding protein 3 promotes cell migration and lymph node metastasis of oral squamous cell carcinoma cells by requirement of integrin $\beta$ 1

Yi-Chen Yen, Jenn-Ren Hsiao, Shih Sheng Jiang, Jeffrey S. Chang, Ssu-Han Wang, Ying-Ying Shen, Chung-Hsing Chen, I-Shou Chang, Jang-Yang Chang and Ya-Wen Chen

Present: During final preparation of the manuscript by the authors, OAS1 (2'-5'- oligoadenylate synthetase 1) was mixed up with OSA1 (ARID1B AT rich interactive domain 1A). Additionally, OAS2 (2'-5'- oligoadenylate synthetase 2) was mixed with OSA2 (ARID1B AT rich interactive domain 1B). These errors resulted in incorrect presentation of Table 2.

Corrected: Correct Table 2 is provided below. The authors sincerely apologize for this error.

Original article: Oncotarget. 2015; 6(39): 41837-55. doi: 10.18632/oncotarget.5995.

**Table 2:** List of the top 10 up-regulated and top 5 down-regulated genes.

| De-regulated gene | Description                                                        | Fold change |
|-------------------|--------------------------------------------------------------------|-------------|
| IFI27             | Interferon, alpha-inducible protein 27                             | 162         |
| OAS2              | 2'-5'-oligoadenylate synthetase 2                                  | 21          |
| DHX58             | DEXH (Asp-Glu-X-His) box polypeptide 58                            | 10          |
| CFB               | Complement factor B                                                | 10          |
| ANKRD38           | KN motif and ankyrin repeat domains 4                              | 7.2         |
| PDZK1             | PDZ domain containing 1                                            | 6.6         |
| OAS1              | 2'-5'-oligoadenylate synthetase 1                                  | 6.5         |
| BST2              | Bone marrow stromal cell antigen 2                                 | 6.4         |
| IGFBP3            | Insulin-like growth factor binding protein 3                       | 5.5         |
| IFI6              | Interferon, alpha-inducible protein 6                              | 5.1         |
| PKIA              | Protein kinase (cAMP-dependent, catalytic) inhibitor alpha         | 0.38        |
| SLC47A1           | Solute carrier family 47 (multidrug and toxin extrusion), member 1 | 0.41        |
| CGNL1             | Cingulin-like 1                                                    | 0.45        |
| EPHX1             | Epoxide hydrolase 1, microsomal (xenobiotic)                       | 0.48        |
| PGD               | Phosphogluconate dehydrogenase                                     | 0.53        |
